# Supplementary material for: From ex ovo to in vitro: xenotransplantation and vascularization of mouse embryonic kidneys in a microfluidic chip
Source: Royal Society of Chemistry journal article supplement (doi:10.1039/d4lc00547c), 2024-01-01
Supplement: d4lc00547c2.pdf [file d4lc00547c2.pdf]

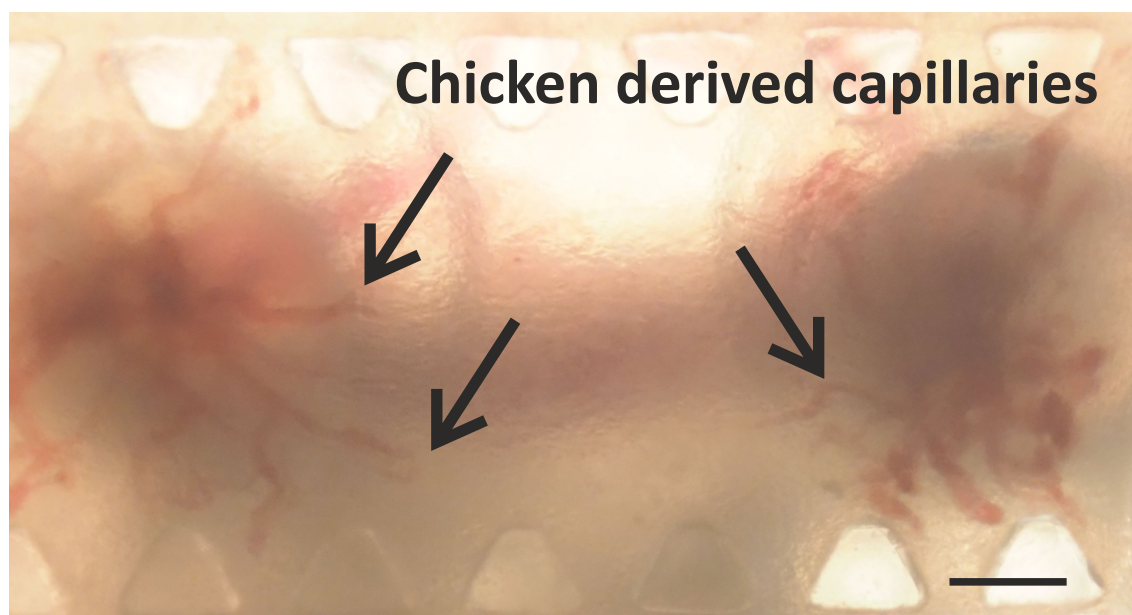

**Suppl. figure 1.**
