# Supplementary material for: From ex ovo to in vitro: xenotransplantation and vascularization of mouse embryonic kidneys in a microfluidic chip
Source: Royal Society of Chemistry journal article supplement (doi:10.1039/d4lc00547c), 2024-01-01
Supplement: d4lc00547c4.pdf [file d4lc00547c4.pdf]

**Vascularized mouse embryonic  
kidney inside of the chip**

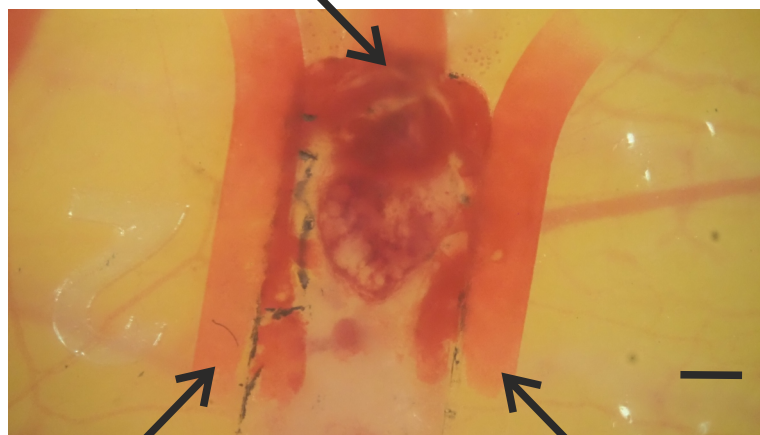

**Lateral channels with leaked blood**

**Suppl. figure 3.**
