# Supplementary material for: From ex ovo to in vitro: xenotransplantation and vascularization of mouse embryonic kidneys in a microfluidic chip
Source: PubMed Central journal article supplement (PMC11408908; doi:10.1039/d4lc00547c), 2024-09-02
Supplement: LC-024-D4LC00547C-s003.pdf [file LC-024-D4LC00547C-s003.pdf]

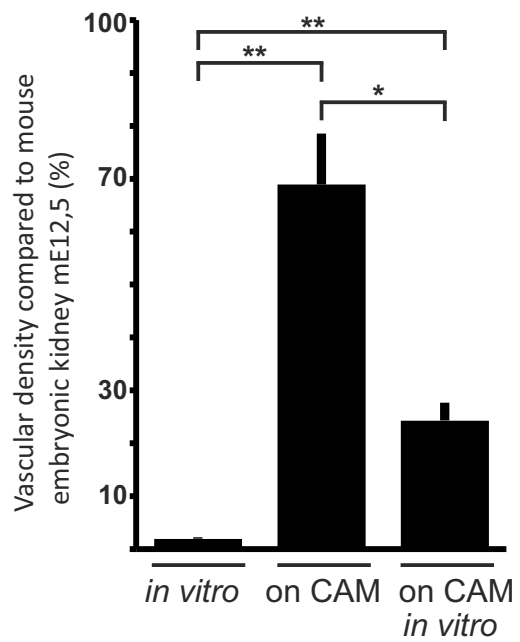

Suppl. figure 2.
